# Supplementary material for: Assessing root–soil interactions in wetland plants: root exudation and radial oxygen loss
Source: Copernicus journal article supplement (doi:10.5194/bg-21-5185-2024), 2024-11-21
Supplement: Supplementary file 1 [file bg-21-5185-2024-supplement.zip]

## Smithsonian Supplemental Terms

1. For purposes of these Smithsonian Supplemental Terms ("Terms"), the Author/Contributor/Editor ("Employee Author") shall mean one or more employee(s) of the Smithsonian Institution ("Smithsonian"), established by the Congress of the United States in 1846 (20 U.S.C. 41 et seq.) and having its principal offices at 1000 Jefferson Drive SW, Washington, D.C., 20560, which shall execute agreements on behalf of its employees. Attachment of the Terms to the submitted manuscript ("Work") constitutes inclusion of the provisions set out below, which modify and supersede, solely with respect to Smithsonian, any conflicting provisions in the Publisher's agreement ("Publisher Agreement"), and acceptance and/or publication of the Work constitutes Publisher's acceptance of the Terms.
2. The Publisher Agreement and the Terms shall apply only to the Work and shall not be extended or retroactively applied to other manuscripts authored and co-authored by Smithsonian or its employees.
3. The Agreement and the Terms shall apply only to the Employee Author. Publisher acknowledges that Smithsonian cannot accept joint and several liability for co-authors who are not Smithsonian employees.
4. Publisher acknowledges that when an Employee Author is a non-federal employee of Smithsonian, copyright in his/her contribution to the Work is owned and is hereby licensed by Smithsonian. Publisher acknowledges that when an Employee Author is a federal employee of Smithsonian, his/her contribution to the Work was created as part of the Employee Author's official duties and is a work of the U.S. Government, therefore copyright may not be established in the United States. 17 U.S.C. § 105. If Publisher intends to disseminate the Work outside of the United States, Publisher may secure copyright to the extent authorized under the domestic laws of the relevant country, subject to a paid-up, nonexclusive, irrevocable worldwide license to the Smithsonian and to the United States in such copyrighted work to reproduce, prepare derivative works, distribute copies to the public, perform and display publicly, and permit others to do so.
5. To the extent permitted by the United States Anti-Deficiency Act, on behalf of its Employee Author, the Smithsonian agrees to indemnify the Publisher against all liability and expense, including reasonable outside legal fees, arising from or out of any breach or alleged breach of warranties and representations made in the Publisher Agreement. Publisher acknowledges and agrees that the Smithsonian cannot use federal appropriations to fulfill its indemnification obligations hereunder. Notwithstanding the foregoing, the Smithsonian shall not be responsible for any claims, demands, suits, judgments, or expenses arising out of or based upon any third-party claim (including but not limited to Author/Contributor/Editor claims) that the Publisher has, through its actions or its omissions, caused harm, injury, or damages to such third party.
6. Publisher acknowledges that Smithsonian retains the right to make a copy of the accepted manuscript of the Work accessible through one or more non-commercial repositories for the public to read, analyze, and download, following an embargo period of twelve (12) months after first publication by Publisher.
  - a. If Publisher is a publisher member of the Clearinghouse for Open Research of the United States (CHORUS), Publisher shall provide or permit Smithsonian to provide a public access version of the Work for the public to read, analyze, and download after publication and a subsequent embargo period of twelve (12) months.
  - b. If the Work is published open access, Smithsonian may link to the published version of the Work without embargo.
7. Trademarks. The Smithsonian owns, controls, and/or has registered the trademarks/service marks "Smithsonian," "Smithsonian Institution," the names of its museums and programs, and the Smithsonian sunburst logo (the "Names"). Except in connection with the distribution and marketing of the Work, the Publisher agrees that it will not use the Names in any advertising, marketing, or promotional manner without the prior agreement of the Smithsonian.
8. Publisher acknowledges that Smithsonian requires the Employee Author to disclose to the Publisher each source of funding above \$10,000 USD used to support the research conducted by the Employee Author in preparing the Work.

Yolanda Riley Harper  
Smithsonian Institution (print name)

Yolanda Riley Harper  
Authorized Signature

6/25/2019  
Date
