# Supplementary material for: Assessing root–soil interactions in wetland plants: root exudation and radial oxygen loss
Source: Copernicus journal article supplement (doi:10.5194/bg-21-5185-2024), 2024-11-21
Supplement: Supplementary file 3 [file bg-21-5185-2024-supplement.zip]

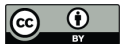

## *Supplement of*

# **Assessing root–soil interactions in wetland plants: root exudation and radial oxygen loss**

**Katherine A. Haviland and Genevieve L. Noyce**

*Correspondence to:* Katherine A. Haviland (havilandk@si.edu)

- [bg-21-5185-2024-supplement-title-page.pdf](#)
- [3-all\\_other\\_si\\_supplemental\\_terms\\_06252019fe.pdf](#)
- [egusphere-2024-1547-supplement.pdf](#)

The copyright of individual parts of the supplement might differ from the article licence.
